# Supplementary material for: Comparing the influence of framework type on H2 absorption in hypothetical and existing clathrasils: a grand canonical Monte Carlo study
Source: Royal Society of Chemistry journal article supplement (doi:10.1039/b604377a), 2006-01-01
Supplement: b604377a.pdf [file b604377a.pdf]

## Supporting information

**Table A1.** Overview of all existing and seven energetically feasible hypothetical clathrasil structures with six-rings as largest accessible opening.

| Structure             | Code             | Packing <sup>a</sup>                                                     | Status       | Tiling type <sup>c</sup> | $\Delta H_f$ [kJ/mol SiO <sub>2</sub> ] <sup>d</sup> | Density [kg/m <sup>3</sup> ] |
|-----------------------|------------------|--------------------------------------------------------------------------|--------------|--------------------------|------------------------------------------------------|------------------------------|
| Afghanite             | AFG              | $(4^6 6^5)^3 (4^6 6^{17})^1$                                             | Existing     | ST                       | 12.9                                                 | 1791                         |
| AlPO <sub>4</sub> -16 | AST              | $(4^6 6^{12})^1 (4^6)^1$                                                 | Existing     | ST                       | 15.8                                                 | 1750                         |
| Dodecasil 1H          | DOH              | $(5^{12} 6^8)^1 (4^3 5^6 6^3)^2 (5^{12})^3$                              | Existing     | ST                       | 13.4                                                 | 1780                         |
| Franzinite            | FRA              | $(4^6 6^{11})^1 (4^6 6^5)^1 (4^6 6^8)^3$                                 | Existing     | ST                       | 13.2                                                 | 1747                         |
| Giuseppettite         | GIU              | $(4^6 6^{23})^1 (4^6 6^8)^2 (4^6 6^5)^5$                                 | Existing     | ST                       | 12.9                                                 | 1789                         |
| Liottite              | LIO              | $(4^6 6^{11})^1 (4^6 6^{17})^1 (4^6 6^5)^4$                              | Existing     | ST                       | 13.7                                                 | 1743                         |
| Losod                 | LOS              | $(4^6 6^5)^1 (4^6 6^{11})^1$                                             | Existing     | ST                       | 13.1                                                 | 1785                         |
| Linde Type N          | LTN <sup>b</sup> | $(4^6 6^8)^3 (4^6 6^5)^4 (4^{12} 6^8 8^6)^1 (4^7 6^8 8^1)^6 (4^6 6^2)^2$ | Existing     | ST                       | 14.7                                                 | 1707                         |
| Marinellite           | MAR              | $(4^6 6^{17})^1 (4^6 6^8)^2 (4^6 6^5)^3$                                 | Existing     | ST                       | 13.0                                                 | 1786                         |
| Melanophlogite        | MEP              | $(5^{12})^1 (5^{12} 6^2)^3$                                              | Existing     | ST                       | 12.0                                                 | 1974                         |
| MCM-61                | MSO              | $(6^8)^1 (4^6 6^{20})^1 (4^6 6^2)^2 (4^2 6^4)^3$                         | Existing     | NST                      | 11.8                                                 | 1858                         |
| ZSM-39                | MTN              | $(5^{12})^2 (5^{12} 6^4)^1$                                              | Existing     | ST                       | 14.9                                                 | 1795                         |
| Nonasil               | NON              | $(5^4 6^4)^2 (4^5 8^5)^2 (5^8 6^{12})^1$                                 | Existing     | NST                      | 9.9                                                  | 1932                         |
| RUB-10                | RUT <sup>b</sup> | $(4^4 5^4 6^2)^1 (4^4 5^6 6^3 8^1)^2$                                    | Existing     | ST                       | 12.2                                                 | 1824                         |
| Sigma-2               | SGT              | $(5^{12} 6^8)^1 (4^3 5^6)^2$                                             | Existing     | ST                       | 12.8                                                 | 1793                         |
| Sodalite              | SOD              | $(4^6 6^8)^1$                                                            | Existing     | ST                       | 12.9                                                 | 1777                         |
| IM-10                 | UOZ              | $(4^6)^2 (4^2 6^4)^1 (4^{10} 6^{20})^1$                                  | Existing     | ST                       | 20.4                                                 | 1951                         |
| -                     | Dt2_106          | $(4^6 6^5)^1 (4^6 6^8)^1 (4^6 6^{11})^1$                                 | Hypothetical | ST                       | 13.0                                                 | 1782                         |
| -                     | Dt2_113          | $(4^4 5^4 6^6)^1$                                                        | Hypothetical | ST                       | 15.4                                                 | 2106                         |
| -                     | Dt2_117          | $(4^2 5^8 6^4)^1$                                                        | Hypothetical | ST                       | 10.5                                                 | 1976                         |
| -                     | Dt3_779          | $(4^6 6^2)^6 (4^6 6^8)^3 (4^6 6^{20})^2$                                 | Hypothetical | ST                       | 26.6                                                 | 1889                         |
| -                     | Dt3_819          | $(4^6 6^2)^6 (4^6 6^5)^8 (4^6 6^8)^3 (4^6 6^{44})^1$                     | Hypothetical | ST                       | 17.8                                                 | 1568                         |
| -                     | Dt3_898          | $(4^6 6^5)^2 (4^6 6^8)^1 (4^6 6^{11})^2$                                 | Hypothetical | ST                       | 13.6                                                 | 1743                         |
| -                     | Dt3_899          | $(4^6 6^5)^2 (4^6 6^8)^2 (4^6 6^{14})^1$                                 | Hypothetical | ST                       | 13.3                                                 | 1766                         |

<sup>a</sup> Each cage type has its own description in between the brackets and the ratio between the different cage types is given by the superscripts outside the brackets. In between brackets the ring types (normal text) and their occurrence (superscript) in a cage type are given.

<sup>b</sup> The eight-ring in these structures are so-called internal eight-rings, i.e., it is not possible to access the crystals via these rings.

<sup>c</sup> An explanation of tiling type can be found in results and discussion.

<sup>d</sup> The heat of formation is given relative to that of quartz, being -12417.6 kJ/mol SiO<sub>2</sub>. See Computational methodology section for calculation details.

**Table A2.** Overview of the tile volumes of the cages of all existing and hypothetical ST clathrasils.

| Existing clathrasils |                  |                           | Hypothetical clathrasils |               |                           |
|----------------------|------------------|---------------------------|--------------------------|---------------|---------------------------|
| Clathrasil           | Cage             | Volume [ $\text{\AA}^3$ ] | Clathrasil               | Cage          | Volume [ $\text{\AA}^3$ ] |
| AFG                  | $(4^66^5)$       | 182                       | Dt2_106                  | $(4^66^5)$    | 183                       |
| AFG                  | $(4^66^{17})$    | 793                       |                          | $(4^66^8)$    | 335                       |
| AST                  | $(4^66^{12})$    | 541                       |                          | $(4^66^{11})$ | 490                       |
| AST                  | $(4^6)$          | 29                        | Dt2_113                  | $(4^45^46^6)$ | 284                       |
| DOH                  | $(5^{12}6^8)$    | 674                       | Dt2_117                  | $(4^25^86^4)$ | 308                       |
| DOH                  | $(4^35^66^3)$    | 226                       | Dt3_779                  | $(4^66^2)$    | 73                        |
| DOH                  | $(5^{12})$       | 227                       |                          | $(4^66^8)$    | 300, 328                  |
| FRA                  | $(4^66^{11})$    | 488, 493                  |                          | $(4^66^{20})$ | 902                       |
| FRA                  | $(4^66^5)$       | 182, 185                  | Dt3_819                  | $(4^66^2)$    | 73                        |
| FRA                  | $(4^66^8)$       | 334, 335, 336, 339        |                          | $(4^66^5)$    | 180                       |
| GIU                  | $(4^66^5)$       | 181, 182                  |                          | $(4^66^8)$    | 343, 345                  |
| GIU                  | $(4^66^8)$       | 334, 335                  | Dt3_898                  | $(4^66^{44})$ | 3202                      |
| GIU                  | $(4^66^{23})$    | 1100                      |                          | $(4^66^5)$    | 188                       |
| LIO                  | $(4^66^{11})$    | 500                       |                          | $(4^66^8)$    | 343                       |
| LIO                  | $(4^66^{17})$    | 814                       | Dt3_899                  | $(4^66^{11})$ | 500                       |
| LIO                  | $(4^66^5)$       | 187                       |                          | $(4^66^5)$    | 182                       |
| LOS                  | $(4^66^5)$       | 183                       |                          | $(4^66^8)$    | 339                       |
| LOS                  | $(4^66^{11})$    | 488                       |                          | $(4^66^{14})$ | 648                       |
| LTN                  | $(4^66^8)$       | 332                       |                          |               |                           |
| LTN                  | $(4^66^8)$       | 340                       |                          |               |                           |
| LTN                  | $(4^66^5)$       | 182                       |                          |               |                           |
| LTN                  | $(4^{12}6^88^6)$ | 1206                      |                          |               |                           |
| LTN                  | $(4^76^88^1)$    | 420                       |                          |               |                           |
| LTN                  | $(4^66^2)$       | 75                        |                          |               |                           |
| MAR                  | $(4^66^5)$       | 181, 182                  |                          |               |                           |
| MAR                  | $(4^66^8)$       | 335, 336                  |                          |               |                           |
| MAR                  | $(4^66^{17})$    | 795                       |                          |               |                           |
| MEP                  | $(5^{12})$       | 224                       |                          |               |                           |
| MEP                  | $(5^{12}6^2)$    | 315                       |                          |               |                           |
| MTN                  | $(5^{12})$       | 242                       |                          |               |                           |
| MTN                  | $(5^{12}6^4)$    | 461                       |                          |               |                           |
| RUT                  | $(4^45^46^2)$    | 134                       |                          |               |                           |
| RUT                  | $(4^45^66^58^1)$ | 425                       |                          |               |                           |
| SGT                  | $(5^{12}6^8)$    | 674                       |                          |               |                           |
| SGT                  | $(4^35^6)$       | 108                       |                          |               |                           |
| SOD                  | $(4^66^8)$       | 337                       |                          |               |                           |
